# Supplementary material for: A Mycobacterium tuberculosis Effector Targets Mitochondrion, Controls Energy Metabolism, and Limits Cytochrome c Exit
Source: PubMed Central journal article supplement (PMC10269737; doi:10.1128/spectrum.01066-23), 2023-04-10
Supplement: spectrum.01066-23-s0001.pdf [file spectrum.01066-23-s0001.pdf]

## SUPPLEMENTARY DATA LEGENDS

**Fig. S1: Rv1813 is detected in *M. tuberculosis* culture filtrate but not in cellular fractions.** Lysate obtained from *M. tuberculosis* H37Rv strain grown in Sauton's medium to logarithmic phase ( $OD_{580} \sim 0.7$ ) were fractionated and probed with anti-Rv1813 polyclonal antibodies. Culture filtrates were obtained from the same culture. Anti-FtsZ (FtsZ is a cytoplasmic protein), anti-GlnA (GlnA is a membrane protein) and anti-RpfB (RpfB is a membrane and cell-wall anchored protein) antibodies were used to confirm the purity of mycobacterial fractions.

### **Fig. S2: $^1\text{H}$ - $^{15}\text{N}$ HSQC spectrum of Rv1813c**

This spectrum was obtained at 800 MHz, 20°C and pH 6,8 with 0.3 mM  $^{15}\text{N}$ -uniformly labeled sample. Cross peak assignments are indicated using the one-letter amino acid code and number following the full-length protein sequence numbering.

### **Fig. S3: Confocal microscopy analysis of Rv1813c family members localization in *Dictyostelium*.**

*Dictyostelium* cells expressing the indicated constructs were fixed, processed for immunofluorescence, and analyzed by confocal microscopy (Airyscan).

(A) Cellular localization of Nt-GFP-tagged Rv1813c. (B) Mitochondrial localization of untagged Rv1813c expressed in *Dictyostelium*. Rv1813c was labeled with a rabbit pAb anti-Rv1813c antibody. Rv1813c colocalizes with Mitoporin, a mitochondrial specific protein. (C) Mitoporin localization in untransfected parental Ax2 cells. Cells were labeled with a mouse mAb to mitoporin revealing characteristic ring shaped structures. A maximum projection of Z confocal sections is shown on the right panel. (D) Localization of different Rv1813c family members of *M. tuberculosis* and *M. marinum* expressed in *Dictyostelium* and revealed by anti-myc labelling. White arrows indicate so mitochondria with affected shapes. Bar, 5  $\mu\text{m}$ .

### **Fig. S4: Rv1813c family localization in HeLa cells**

HeLa cells expressing the indicated constructs were fixed, processed for immunofluorescence, and analyzed by confocal microscopy (Airyscan). Cells were colabeled either with rabbit polyclonal anti-Rv1813c, mouse mAb anti-Cytochrome c, and mitotracker deep red (upper panel) or anti-myc, rabbit anti-grp75 (mitochondria marker) and mitotracker deep red (lower panels). Bar, 10  $\mu\text{m}$ .

## **Supplementary table 1: NMR and refinement statistics for RV1813 protein structures**
